# Supplementary material for: PPARγ inhibition boosts efficacy of PD-L1 Checkpoint Blockade Immunotherapy against Murine Melanoma in a sexually dimorphic manner
Source: PubMed Central journal article supplement (PMC7097912; doi:10.7150/ijbs.42966), 2020-03-05

Supplemental Fig. 1 GW9662 +  $\alpha$ PD-L1 combination treatment increases TIL infiltration and activation in female mice

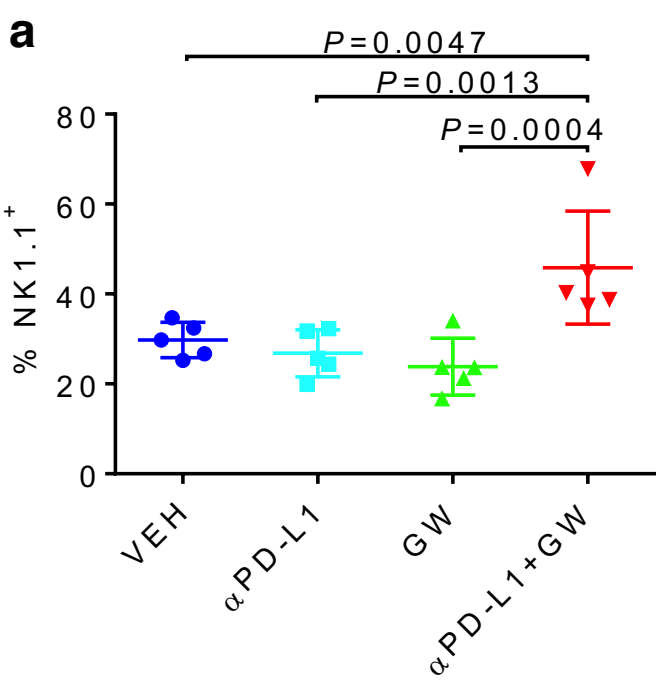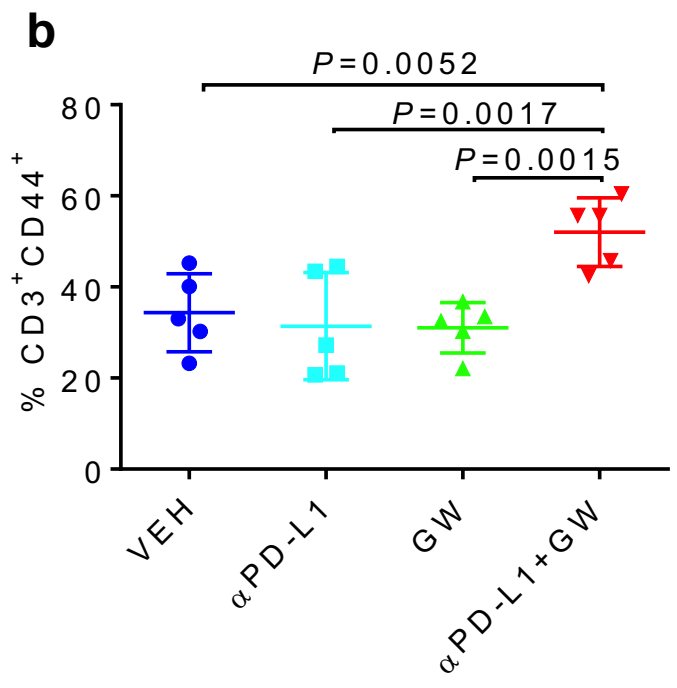

Supplemental Fig. 2 GW9662 +  $\alpha$ PD-L1 combination treatment enhances antitumor immunity in CD4<sup>+</sup> TILs in female hosts

**a**

Gated on CD45<sup>+</sup>CD3<sup>+</sup>CD4<sup>+</sup> TILs

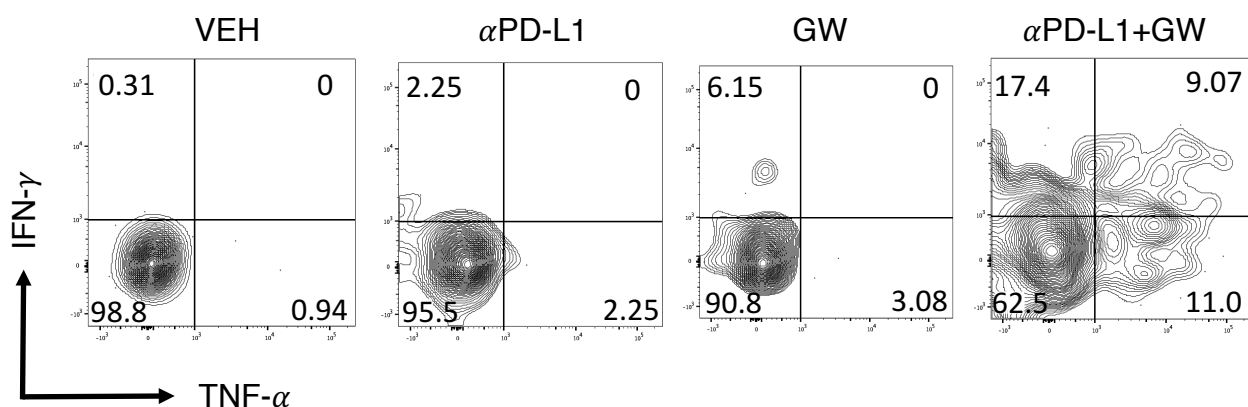

**b**

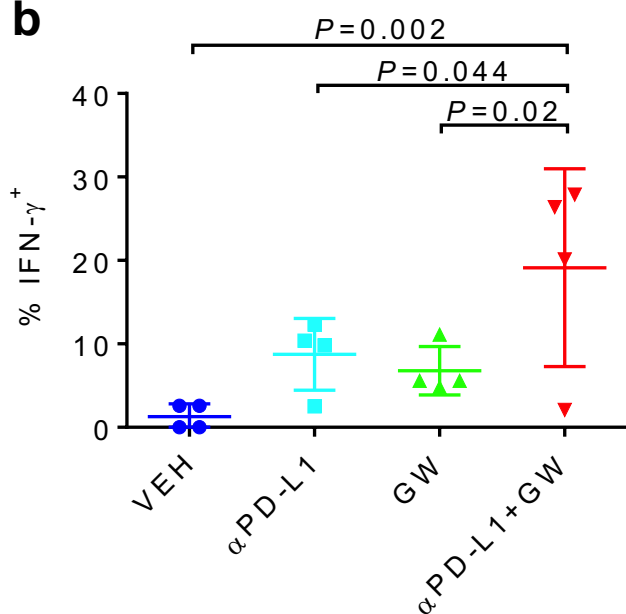

**c**

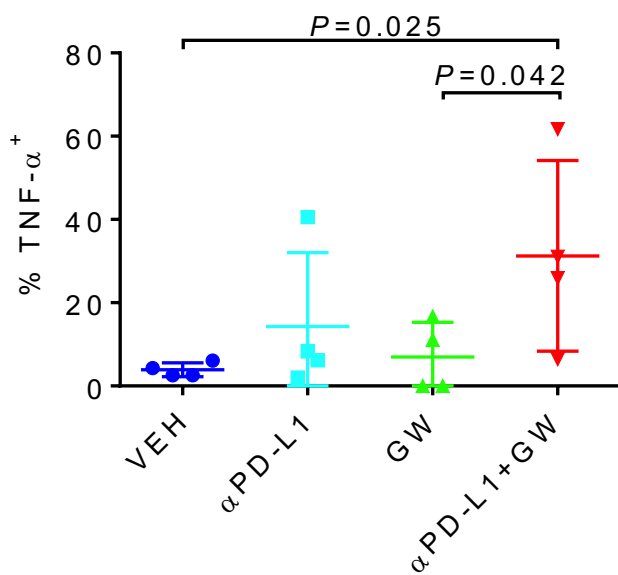

**d**

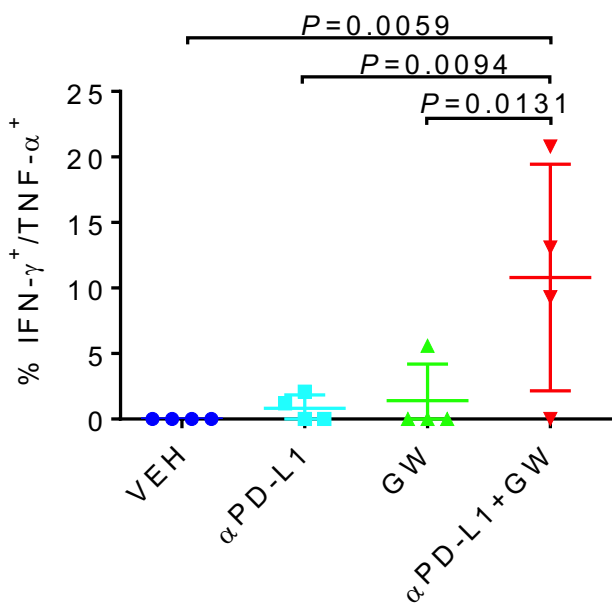

**e**

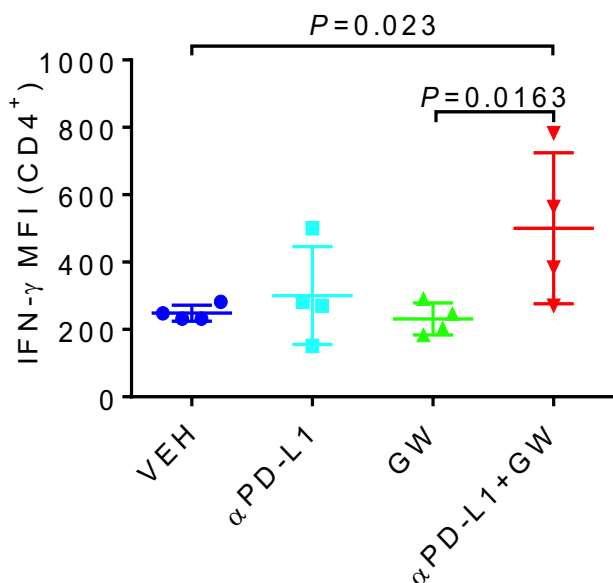

# Supplemental Fig. 3 Ovaries are dispensable for antitumor efficacy of $\alpha$ PD-L1+GW9662 treatment

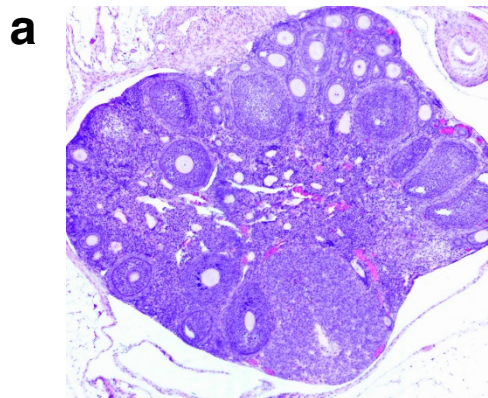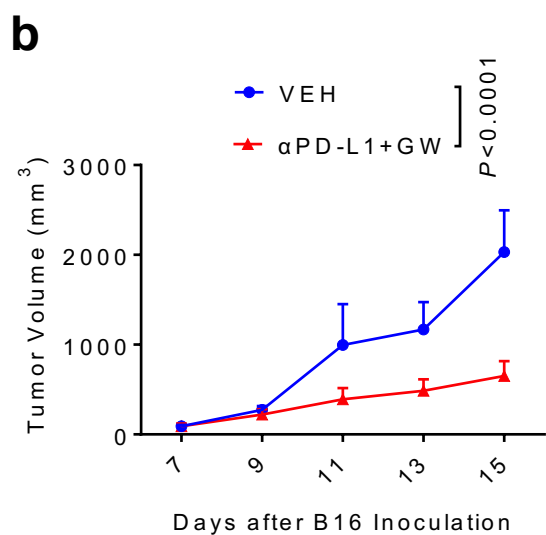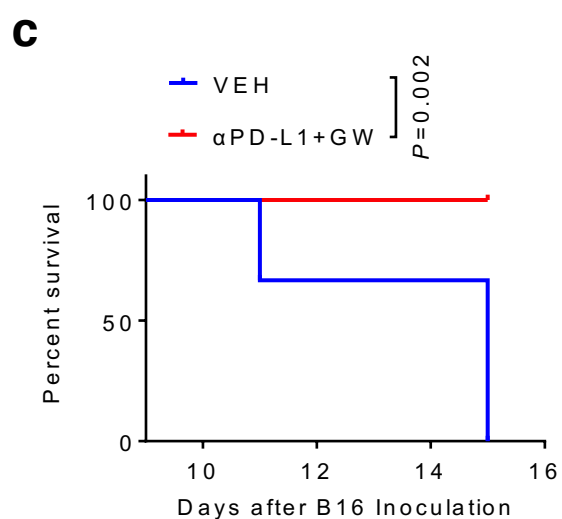

Supplemental Fig. 4 High-fat diet effect on B16 melanoma response to  $\alpha$ PD-L1 in male and female mice

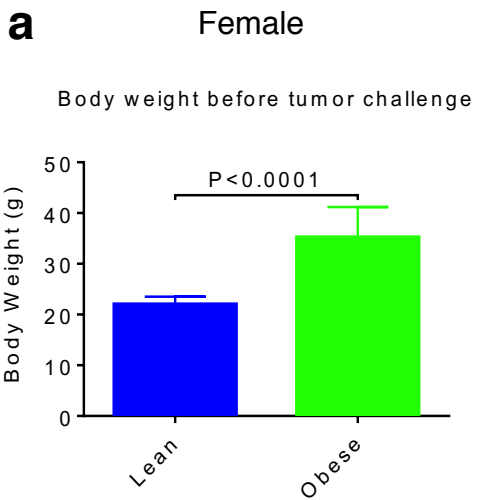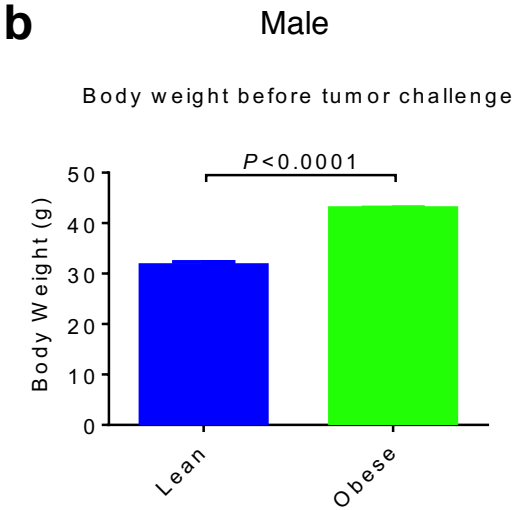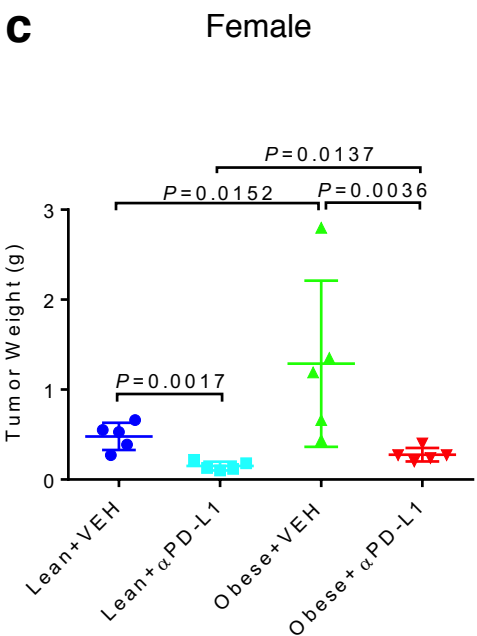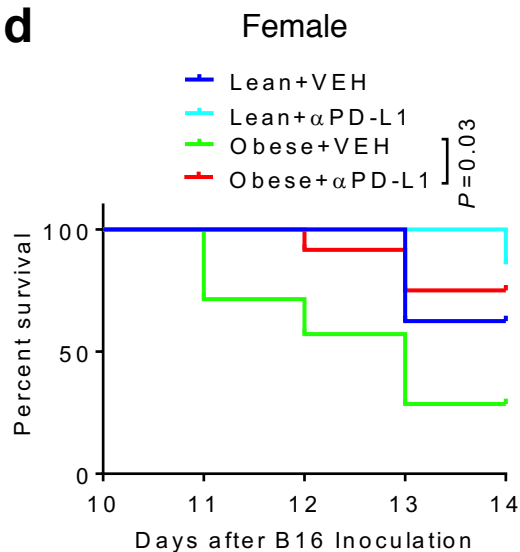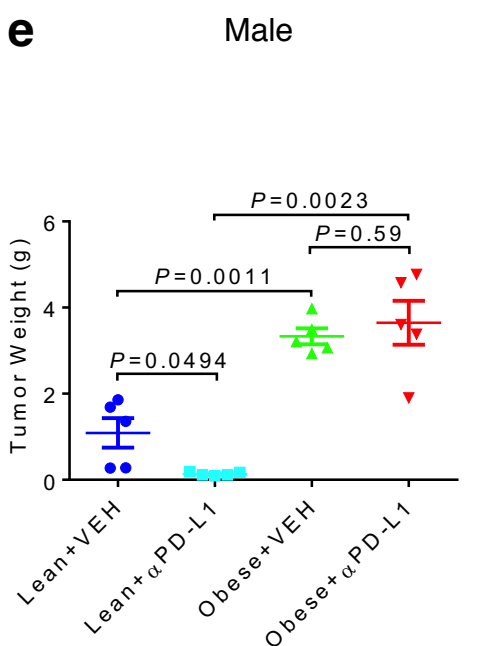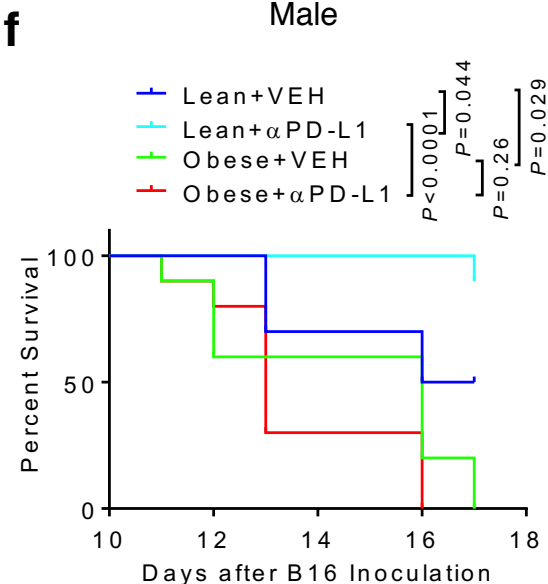

Supplemental Fig. 5 Immuno-phenotyping of B16 tumor-bearing lean and obese male mice

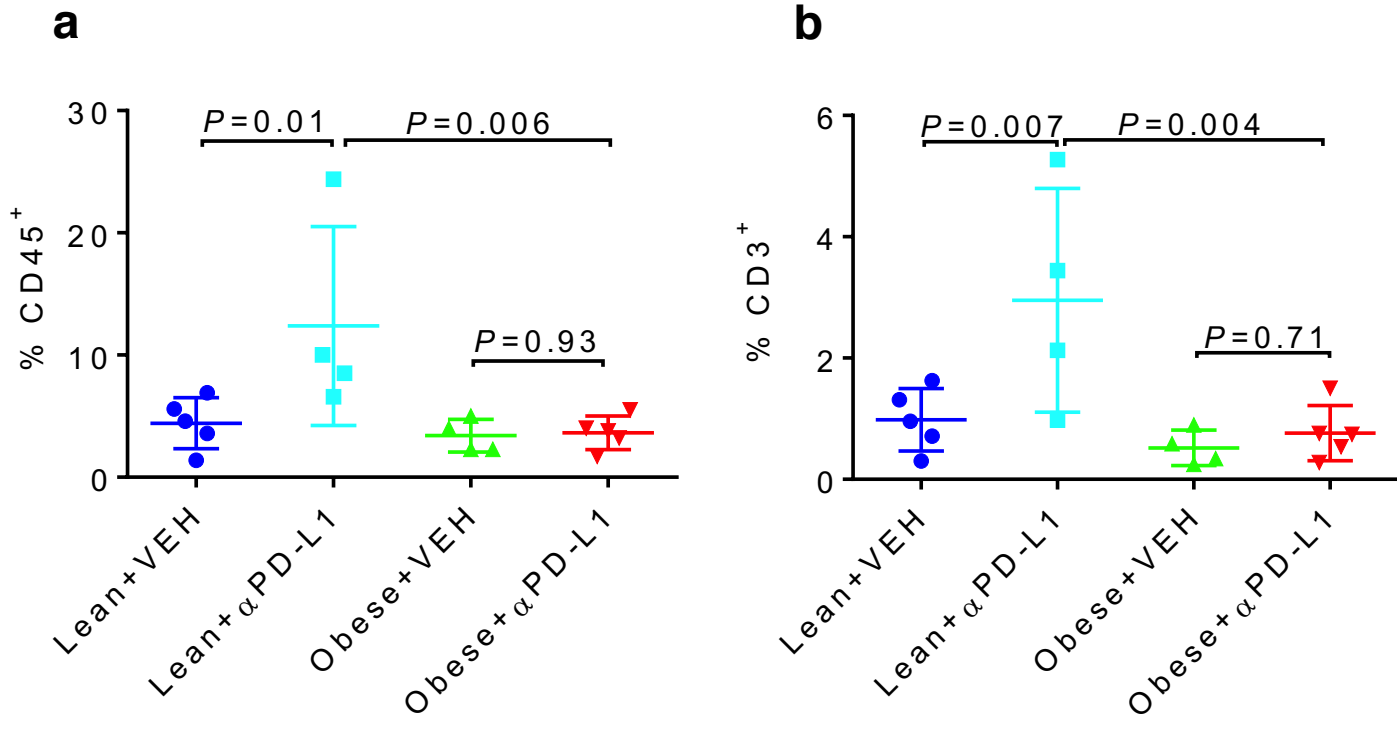

Supplement: ijbsv16p1526s1.pdf [file ijbsv16p1526s1.pdf]
